# Supplementary material
Source: PubMed Central journal article supplement (PMC8015404)
Supplement: mmc1.pdf [file mmc1.pdf]

**Cell Reports, Volume 35**

**Supplemental information**

**Establishment of a reverse genetics system  
for SARS-CoV-2 using circular  
polymerase extension reaction**

**Shiho Torii, Chikako Ono, Rigel Suzuki, Yuhei Morioka, Itsuki Anzai, Yuzy Fauzyah, Yusuke Maeda, Wataru Kamitani, Takasuke Fukuhara, and Yoshiharu Matsuura**

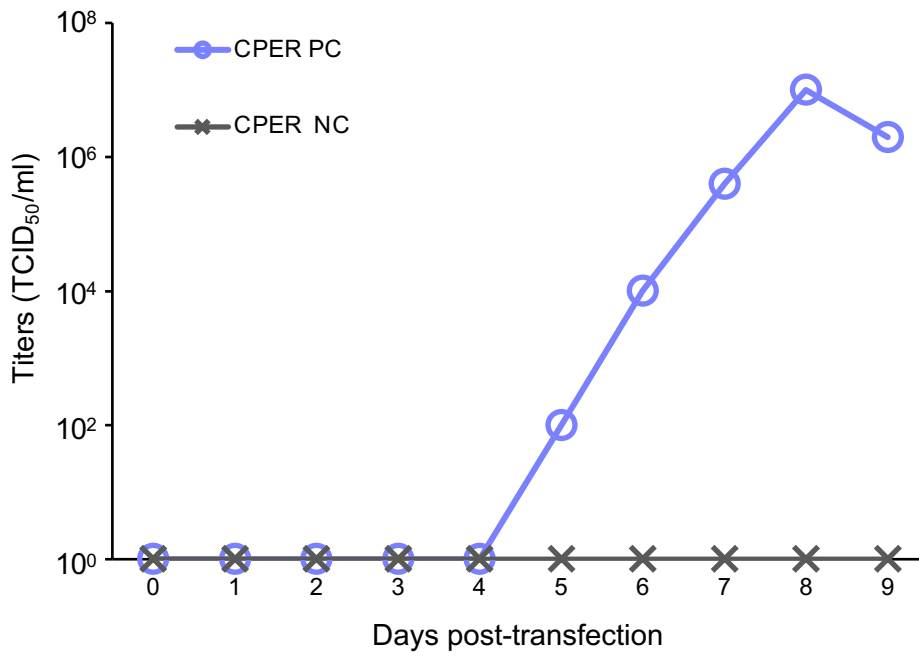

**Figure S1. Production of recombinant SARS-CoV-2. Figure S1 is related to Figure 1A.** CPER products were transfected into HEK293-3P6C33 cells (CPER PC) and infectious titers in the culture supernatants were measured at the indicated time points. As a negative control, the CPER product obtained without fragment F9/10 was transfected into cells (CPER NC).

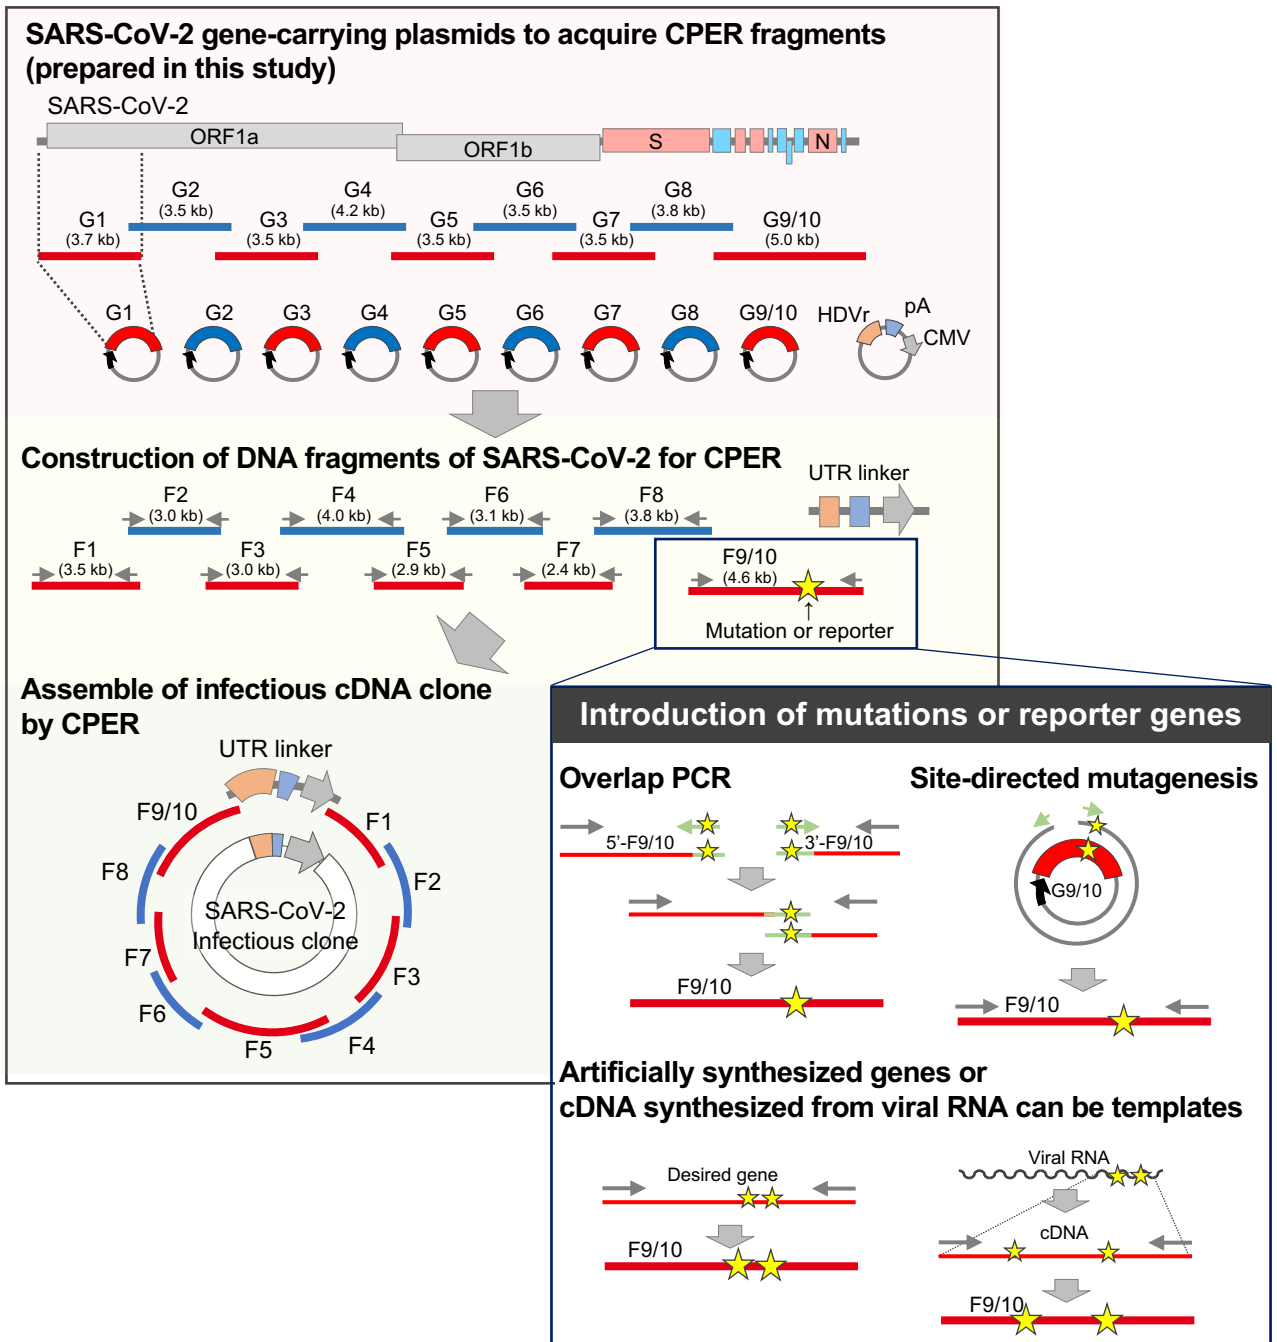

**Figure S2. Workflow to generate infectious cDNA clone for SARS-CoV-2 with desirable mutations or reporters. Figure S2 is related to Figure 2.**

By using DNA fragments and overlapping primers, which possess mutations or reporter genes, mutation can be introduced. By site-directed mutagenesis using SARS-CoV-2 gene-encoding plasmids, mutations can also be introduced. Using artificially synthesized gene fragments with mutations, multiple mutations can be inserted more quickly. In addition, reverse-transcribed cDNA from viral RNA can be used as templates for amplification of DNA fragments of SARS-CoV-2.

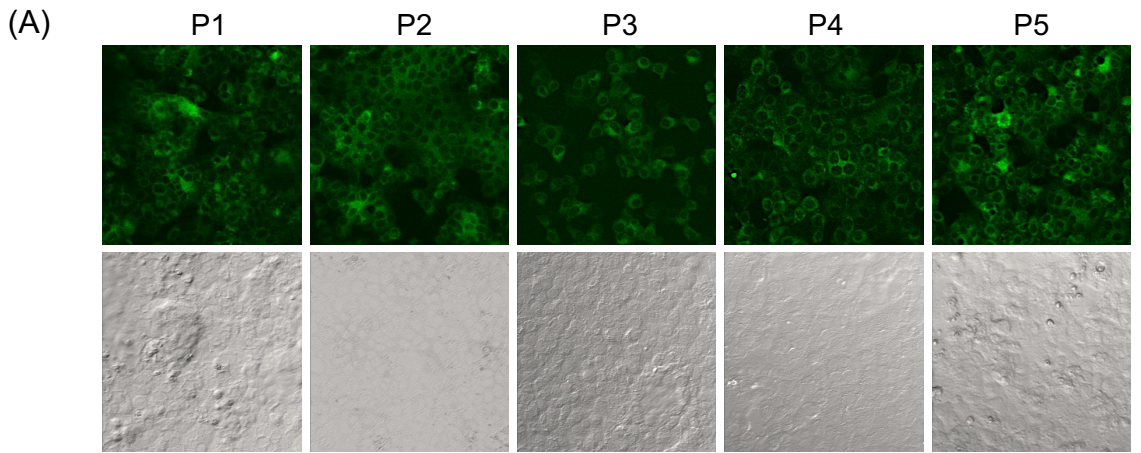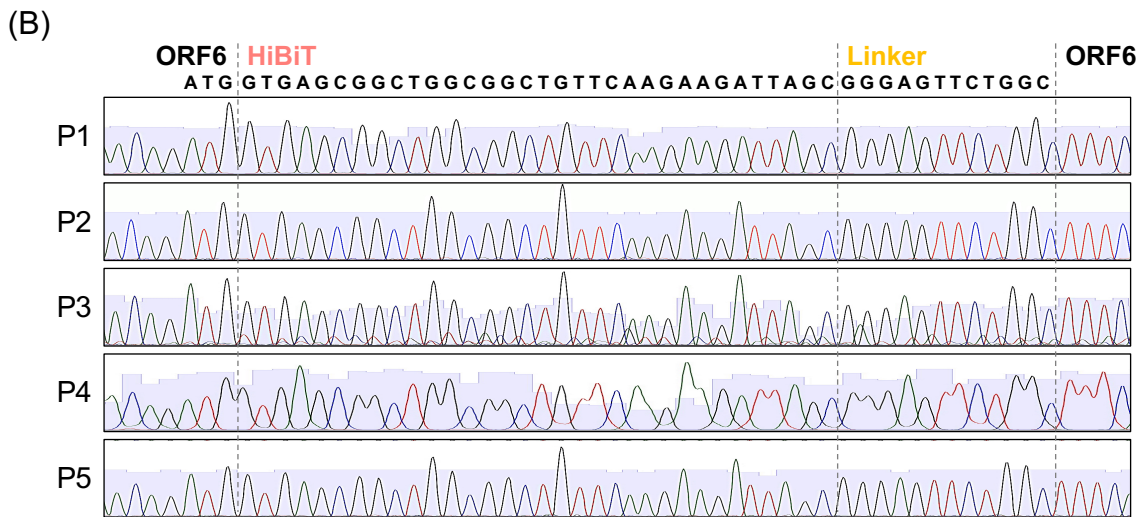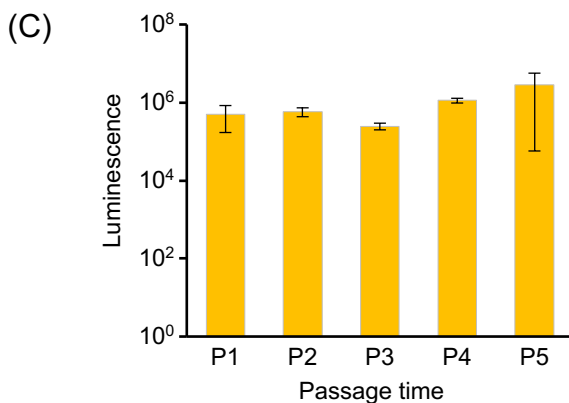

**Figure S3. Stability of reporter genes in recombinant SARS-CoV-2 engineered by CPER. Figure S3 is related to Figure 2A-E.**

(A) GFP viruses serially passaged for five times (P1-P5) were infected with VeroE6/TMPRSS2 cells at an MOI of 0.01 and the fluorescent signals in cells were observed at 24 hpi. (B) HiBiT viruses were serially passaged for five rounds (P1-P5), and the sequence of HiBiT and a linker inserted into the ORF6 of each virus was determined. (C) HiBiT viruses (P1-P5) were inoculated into VeroE6/TMPRSS2 cells at an MOI of 0.01 and luciferase activities were determined at 24 hpi.
